# Supplementary material for: Impact of Kidney Failure on the Severity of COVID-19
Source: MDPI journal article supplement (doi:10.3390/jcm10092042), 2021-05-10
Supplement: s1 [file s1]

# Impact of Kidney Failure on the Severity of COVID-19

**Supplementary Table S1.** Medications for the treatment of comorbidities.

| Concomitant medications       | eGFR > 60 mL/min<br><i>n</i> = 1867 | eGFR 30-60 mL/min<br><i>n</i> = 373 | eGFR < 30 mL/min<br><i>n</i> = 82 |
|-------------------------------|-------------------------------------|-------------------------------------|-----------------------------------|
| ACE blockers                  | 264 (14.1)                          | 86 (23.1)                           | 13 (15.9)                         |
| Sartans                       | 145 (7.8)                           | 48 (12.9)                           | 12 (14.6)                         |
| Beta blockers                 | 341 (18.3)                          | 123 (33.0)                          | 35 (42.7)                         |
| Calcium channel blockers      | 174 (9.3)                           | 60 (17.1)                           | 18 (30)                           |
| Diuretics                     | 160 (8.6)                           | 91 (24.4)                           | 28 (34.1)                         |
| Alpha blockers                | 27 (1.4)                            | 12 (3.2)                            | 2 (2.4)                           |
| Allopurinol                   | 16 (0.9)                            | 14 (3.8)                            | 2 (2.4)                           |
| Statins                       | 107 (5.7)                           | 39 (10.5)                           | 9 (11)                            |
| Insulin                       | 56 (3)                              | 25 (6.7)                            | 11 (13.4)                         |
| Metformin                     | 165 (8.8)                           | 51 (13.7)                           | 7 (8.5)                           |
| Other oral antidiabetic drugs | 25 (1.3)                            | 23 (6.2)                            | 6 (7.3)                           |
| Oral anticoagulants           | 92 (4.9)                            | 61 (17.4)                           | 13 (15.9)                         |
| Acetylosalicylic acid         | 74 (4)                              | 30 (8.0)                            | 6 (7.3)                           |
| Steroids- systemic            | 31 (1.7)                            | 17 (4.6)                            | 2 (2.4)                           |
| Immunosuppressive drugs       | 19 (1)                              | 8 (2.1)                             | 1 (1.2)                           |
| Proton pump inhibitors        | 33 (1.8)                            | 16 (4.3)                            | 0                                 |
| Antidepressants               | 49 (2.6)                            | 5 (1.3)                             | 0                                 |
| Antiepileptic drugs           | 35 (1.9)                            | 5 (1.3)                             | 1 (1.2)                           |
| Sedatives                     | 14 (0.7)                            | 2 (0.5)                             | 0                                 |
| Antipsychotic drugs           | 67 (3.6)                            | 16 (4.3)                            | 5 (6.1)                           |

**Supplementary Table S2.** Patients with eGFR < 30 mL/min according to dialysis.

| Characteristic                                                                   | Dialysis patients<br><i>n</i> = 14 | Patients with non-dialysis<br>dependent CKD, <i>n</i> = 68 | <i>P</i> -value |
|----------------------------------------------------------------------------------|------------------------------------|------------------------------------------------------------|-----------------|
| Age                                                                              |                                    |                                                            |                 |
| Mean (SD)                                                                        | 71.8 (9.5)                         | 77.5 (13.3)                                                | 0.03            |
| >70 years (%)                                                                    | 7 (50)                             | 50 (73.5)                                                  | 0.11            |
| Gender                                                                           |                                    |                                                            |                 |
| Female, <i>n</i> (%)                                                             | 7 (50)                             | 37 (54.4)                                                  | 0.78            |
| Male, <i>n</i> (%)                                                               | 7 (50)                             | 31 (45.6)                                                  | 0.78            |
| Body mass index, mean (SD)                                                       | 28.8 (7.8)                         | 29.2 (6.8)                                                 | 0.82            |
| Disease severity at the baseline, <i>n</i> (%)                                   |                                    |                                                            |                 |
| oxygen saturation 91-95%                                                         | 4 (28.6)                           | 20 (29.4)                                                  | 1.00            |
| oxygen saturation ≤90%                                                           | 6 (42.9)                           | 37 (54.4)                                                  | 0.56            |
| Score on ordinal scale, <i>n</i> (%)                                             |                                    |                                                            |                 |
| 4. hospitalized, requiring no oxygen supplementation, but requiring medical care | 3 (21.4)                           | 17 (25)                                                    | 1.00            |
| 5. hospitalized, requiring normal oxygen supplementation                         | 10 (71.4)                          | 44 (64.7)                                                  | 0.76            |
| 6. hospitalized, on non-invasive ventilation with high-flow oxygen equipment     | 0                                  | 3 (4.4)                                                    | 1.00            |
| 7. hospitalized, for invasive mechanical ventilation or ECMO                     | 0                                  | 3 (4.4)                                                    | 1.00            |

|                                                                       |            |           |      |
|-----------------------------------------------------------------------|------------|-----------|------|
| Concomitant medications, <i>n</i> (%)                                 | 12 (85.7)  | 57 (83.8) | 1.00 |
| Coexisting conditions (>10% prevalence was included),<br><i>n</i> (%) | 13 (92.9%) | 64 (94.1) | 1.00 |
| arterial hypertension                                                 | 7 (50%)    | 46 (67.6) | 0.23 |
| coronary artery disease                                               | 6 (42.9)   | 21 (30.9) | 0.53 |
| heart failure                                                         | 4 (28.6)   | 16 (23.5) | 0.73 |
| atrial fibrillation                                                   | 4 (28.6)   | 7 (10.3)  | 0.09 |
| diabetes                                                              | 3 (21.4)   | 27 (39.7) | 0.24 |
| malignancy                                                            | 2 (14.3)   | 7 (10.3)  | 0.65 |
| Medication-related to COVID-19, <i>n</i> (%)                          |            |           |      |
| Remdesivir                                                            | 0          | 5 (7.4)   | 0.58 |
| Tocilizumab                                                           | 1 (7.1)    | 13 (19.1) | 0.44 |
| Dexamethason                                                          | 6 (42.9)   | 29 (42.6) | 1.00 |
| Covaescent plasma                                                     | 4 (28.6)   | 12 (17.6) | 0.46 |
| Low molecular weight heparin                                          | 9 (64.3)   | 60 (88.2) | 0.04 |
| Death, <i>n</i> (%)                                                   | 6 (42.9)   | 29 (42.6) | 1.00 |
| Mechanical ventilation, <i>n</i> (%)                                  | 0          | 10 (14.7) | 0.20 |
| Clinical improvement 14th day, <i>n</i> (%)                           | 4 (28.6%)  | 17 (25)   | 0.75 |
| Clinical improvement 21st day, <i>n</i> (%)                           | 6 (42.9%)  | 28 (41.2) | 1.00 |
| Clinical improvement 28th day, <i>n</i> (%)                           | 7 (50%)    | 33 (48.5) | 1.00 |

**Supplementary Table S3.** Patients with baseline CRP  $\geq 100$  mg/L - outcome according to kidney function.

|                                                | <b>A</b><br><b>eGFR &gt; 60</b><br><b>mL/min</b> | <b>B</b><br><b>eGFR 30-60</b><br><b>mL/min</b> | <b>C</b><br><b>eGFR &lt; 30</b><br><b>mL/min</b> | <b>Odds Ratio</b><br><b>A vs. B</b> | <b>Odds Ratio</b><br><b>B vs. C</b> | <b>Odds Ratio</b><br><b>A vs. C</b> |
|------------------------------------------------|--------------------------------------------------|------------------------------------------------|--------------------------------------------------|-------------------------------------|-------------------------------------|-------------------------------------|
| <b><i>n</i></b>                                | <b><i>n</i> = 460</b>                            | <b><i>n</i> = 120</b>                          | <b><i>n</i> = 38</b>                             |                                     |                                     |                                     |
| Death, <i>n</i> (%)                            | 73 (15.9%)                                       | 45 (37.5%)                                     | 17 (44.7%)                                       | 0.31<br>(0.20–0.49)<br>P < 0.001    | 0.74<br>(0.35–1.55)<br>P = 0.45     | 0.23<br>(0.11–0.46)<br>P < 0.001    |
| Mechanical ventilation,<br><i>n</i> (%)        | 58 (12.6%)                                       | 19 (15.8%)                                     | 4 (10.5%)                                        | 0.77<br>(0.43–1.35)<br>P = 0.37     | 1.60<br>(0.51–5.04)<br>P = 0.60     | 1.22<br>(0.42–3.58)<br>P = 1.00     |
| Clinical improvement 14th<br>day, <i>n</i> (%) | 202 (43.9%)                                      | 33 (27.5%)                                     | 8 (21.1%)                                        | 2.06<br>(1.33–3.21)<br>P = 0.001    | 1.42<br>(0.59–3.42)<br>P = 0.52     | 2.94<br>(1.31–6.54)<br>P = 0.006    |
| Clinical improvement 21st<br>day, <i>n</i> (%) | 315 (58.5%)                                      | 45 (37.5%)                                     | 13 (34.2%)                                       | 3.62<br>(2.38–5.51)<br>P < 0.001    | 1.15<br>(0.54–2.48)<br>P = 0.84     | 4.18<br>(2.08–8.40)<br>P < 0.001    |
| Clinical improvement 28th<br>day, <i>n</i> (%) | 350 (76.1%)                                      | 67 (55.8%)                                     | 17 (44.7%)                                       | 2.51<br>(1.65–3.83)<br>P < 0.001    | 1.56<br>(0.75–3.25)<br>P = 0.26     | 3.93<br>(2.00–7.71)<br><0.001       |

**Supplementary Table S4.** Patients with baseline SpO<sub>2</sub>  $\leq 90\%$  - outcome according to kidney function.

|                 | <b>A</b><br><b>eGFR &gt; 60</b><br><b>mL/min</b> | <b>B</b><br><b>eGFR 30-60</b><br><b>mL/min</b> | <b>C</b><br><b>eGFR &lt; 30</b><br><b>mL/min</b> | <b>Odds Ratio</b><br><b>A vs. B</b> | <b>Odds Ratio</b><br><b>B vs. C</b> | <b>Odds Ratio</b><br><b>A vs. C</b> |
|-----------------|--------------------------------------------------|------------------------------------------------|--------------------------------------------------|-------------------------------------|-------------------------------------|-------------------------------------|
| <b><i>n</i></b> | <b><i>n</i> = 526</b>                            | <b><i>n</i> = 169</b>                          | <b><i>n</i> = 43</b>                             |                                     |                                     |                                     |

|                                                |             |            |            |                                    |                                    |                                     |
|------------------------------------------------|-------------|------------|------------|------------------------------------|------------------------------------|-------------------------------------|
| Death, <i>n</i> (%)                            | 86 (16.5%)  | 60 (35.5%) | 24 (55.8%) | 0.35<br>(0.24–0.52)<br>P < 0.001   | 0.44<br>(0.22–0.86)<br>P = 0.02    | 0.15<br>(0.08–0.29)<br>P < 0.001    |
| Mechanical ventilation,<br><i>n</i> (%)        | 71 (13.5%)  | 29 (17.2%) | 8 (18.6%)  | 0.75<br>(0.47–1.21)<br>P = 0.26    | 0.91<br>(0.38–2.15)<br>P = 0.82    | 0.68<br>(0.30–1.53)<br>P = 0.36     |
| Clinical improvement 14th<br>day, <i>n</i> (%) | 228 (43.3%) | 48 (28.4%) | 9 (20.9%)  | 1.93<br>(1.32–2.81)<br>P < 0.001   | 1.50<br>(0.67–3.36)<br>P = 0.44    | 2.89<br>(1.36–6.15)<br>P = 0.004    |
| Clinical improvement 21st<br>day, <i>n</i> (%) | 349 (66.3%) | 75 (44.4%) | 12 (28.4%) | 2.47<br>(1.74–3.52)<br>P < 0.001   | 2.06<br>(1.00–4.23)<br>P = 0.06    | 5.09<br>(2.55–10.16)<br>P < 0.001   |
| Clinical improvement 28th<br>day, <i>n</i> (%) | 396 (75.3%) | 95 (56.2%) | 14 (32.6%) | 2.37<br>(1.65 – 3.42)<br>P < 0.001 | 2.66<br>(1.31 – 5.39)<br>P = 0.006 | 6.31<br>(3.23 – 12.31)<br>P < 0.001 |

**Supplementary Table S5.** Patients with baseline D-dimers  $\geq 1000$  ng/mL - outcome according to kidney function.

|                                                | <b>A</b><br><b>eGFR &gt; 60</b><br><b>mL/min</b> | <b>B</b><br><b>eGFR 30–60</b><br><b>mL/min</b> | <b>C</b><br><b>eGFR &lt; 30</b><br><b>mL/min</b> | <b>Odds Ratio</b><br><b>A vs. B</b> | <b>Odds Ratio</b><br><b>B vs. C</b> | <b>Odds Ratio</b><br><b>A vs. C</b> |
|------------------------------------------------|--------------------------------------------------|------------------------------------------------|--------------------------------------------------|-------------------------------------|-------------------------------------|-------------------------------------|
| <b><i>n</i></b>                                | <b><i>n</i> = 530</b>                            | <b><i>n</i> = 186</b>                          | <b><i>n</i> = 50</b>                             |                                     |                                     |                                     |
| Death, <i>n</i> (%)                            | 76 (14.3%)                                       | 56 (30.1%)                                     | 25 (50%)                                         | 0.39<br>(0.26–0.58)<br>P < 0.001    | 0.43<br>(0.23–0.81)<br>P = 0.01     | 0.17<br>(0.09–0.31)<br>P < 0.001    |
| Mechanical ventilation,<br><i>n</i> (%)        | 38 (7.2%)                                        | 24 (12.9%)                                     | 7 (14%)                                          | 0.52<br>(0.30–0.90)<br>P = 0.02     | 0.91<br>(0.38–2.25)<br>P = 0.81     | 0.47<br>(0.20–1.12)<br>P = 0.09     |
| Clinical improvement 14th<br>day, <i>n</i> (%) | 251 (47.4%)                                      | 69 (37.1%)                                     | 14 (28%)                                         | 1.52<br>(1.08–2.15)<br>P = 0.02     | 1.51<br>(0.76–3.01)<br>P = 0.25     | 2.31<br>(1.22–4.39)<br>P = 0.01     |
| Clinical improvement 21st<br>day, <i>n</i> (%) | 370 (69.8%)                                      | 96 (51.6%)                                     | 19 (38%)                                         | 2.17<br>(1.54–3.05)<br>P < 0.001    | 1.74<br>(0.92–3.30)<br>P = 0.11     | 3.77<br>(2.07–6.88)<br>P < 0.001    |
| Clinical improvement 28th<br>day, <i>n</i> (%) | 408 (77%)                                        | 117 (62.9%)                                    | 22 (44%)                                         | 1.97<br>(1.38–2.83)<br>P < 0.001    | 2.16<br>(1.15–4.06)<br>P = 0.02     | 4.25<br>(2.35–7.71)<br>P < 0.001    |
